# Supplementary material for: Retrograde monosynaptic tracing through an engineered human embryonic stem cell line reveals synaptic inputs from host neurons to grafted cells
Source: PubMed Central journal article supplement — Cell Regen. 2019 Mar 1;8(1):1–8. doi: 10.1016/j.cr.2019.01.002 (PMC6557763; doi:10.1016/j.cr.2019.01.002), 2019-03-01
Supplement: mmc1.pdf [file mmc1.pdf]

**Figure S1. Intracortically grafted forebrain-fate NPCs differentiated and received synaptic inputs from host neurons (related to Figures 1, 2 and 3)**

- A. qRT-PCR analysis of *OCT4*, *NANOG*, *EN1*, *GBX2* and *HOBX2* in H1 hESCs and induced NPCs derived from H1-CAG-GTRgp cells (related to Figure 1).
- B. Representative immunohistochemical staining of GAD67, TH and CHAT in brain slices at 6 mpt (related to Figure 2).
- C. Representative images of mCherry fluorescence in H1 hESCs and H1-CAG-GTRgp hESCs infected with EnvA-pseudotyped rabies viruses (related to Figure 3).

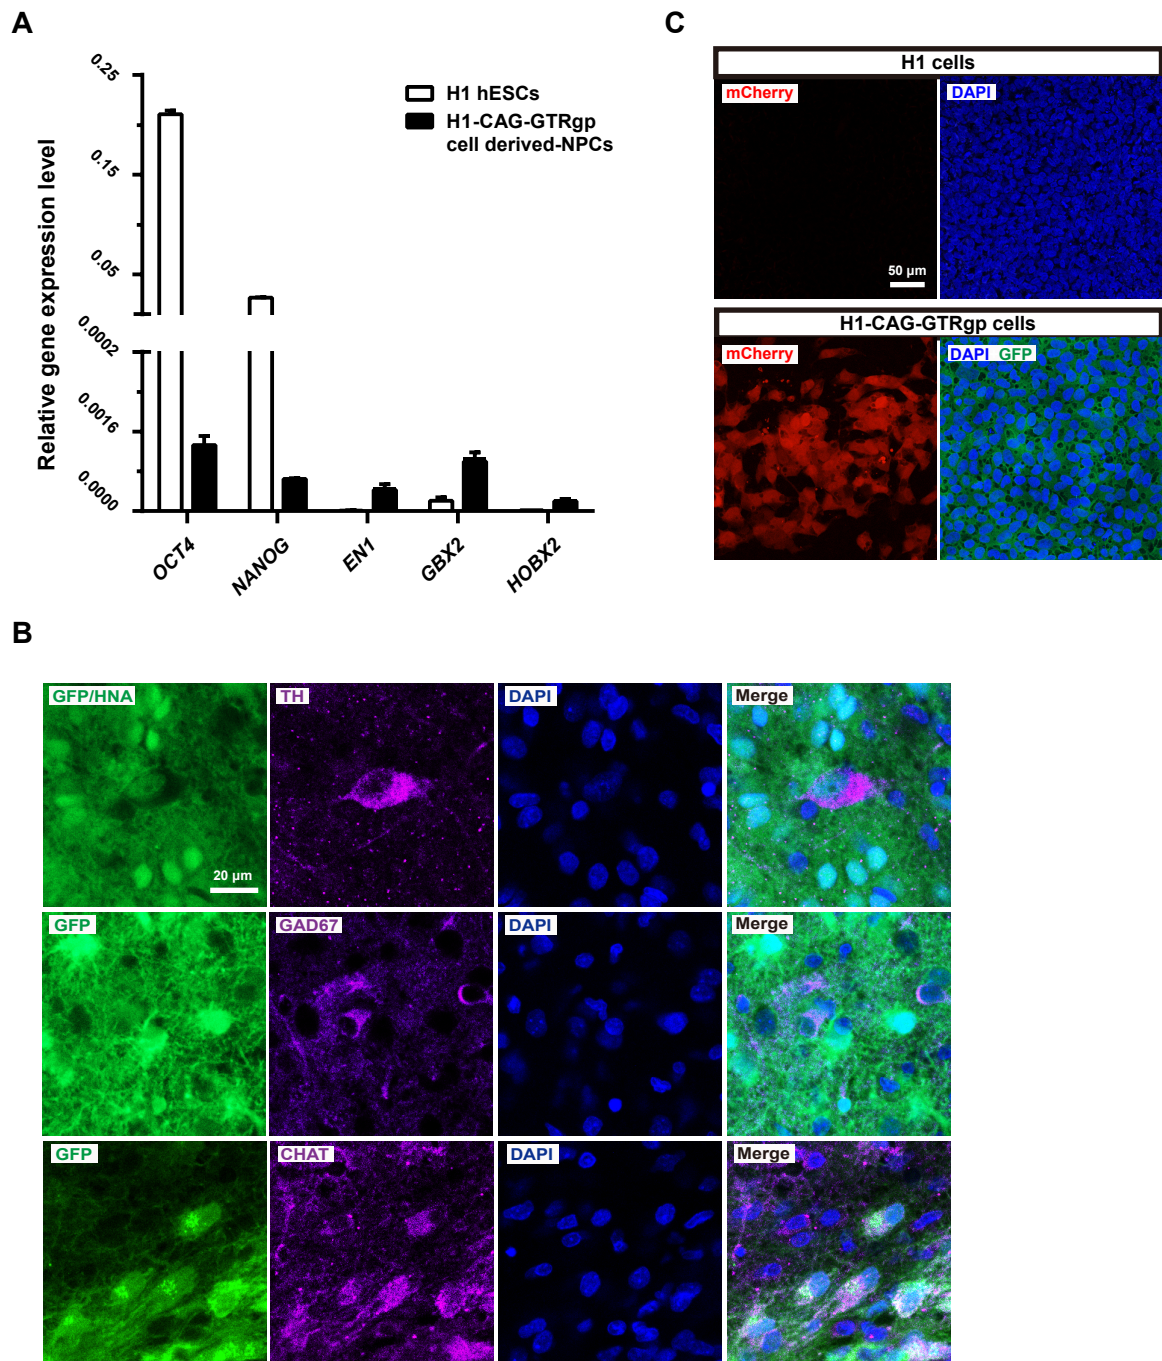

Figure S1

**Table S1. Primers used in this study**

| <b>sgRNA and primers for gene targeting</b> |                                |                               |
|---------------------------------------------|--------------------------------|-------------------------------|
|                                             | <b>Sequence (5'→3')</b>        |                               |
| sgRNA                                       | AGGGCCGGTTAATGTGGCTC           |                               |
|                                             | <b>Forward primers (5'→3')</b> | <b>Reward primers (5'→3')</b> |
| 5'arm                                       | ACCCTATGCTGACACCCCGT           | GGGGTGGAGGGGACAGATAAAAAG      |
| 3'arm                                       | CCACTAGGGACAGGATTGGTGACA       | CTTGGGAAGTGTAAGGAAGCTGCAG     |
| Primer-F/R                                  | ATGGTGAGCAAGGGCGAGGAGCTGTT     | CTAGCCACTAAGGCAATTGGGGTG      |
| <b>qRT-PCR primers</b>                      |                                |                               |
| <b>Gene</b>                                 | <b>Forward primers (5'→3')</b> | <b>Reward primers (5'→3')</b> |
| <i>GAPDH</i>                                | TCCAAAATCAAGTGGGGCGAT          | TTCTAGACGGCAGGTCAGGTC         |
| <i>OCT4</i>                                 | CCTCACTTCACTGCACTGTA           | CAGGTTTTCTTTCCCTAGCT          |
| <i>SOX2</i>                                 | GCCGAGTGGAACTTTTGTCG           | GGCAGCGTGTACTTATCCTTCT        |
| <i>NANOG</i>                                | TGAACCTCAGCTACAAACAG           | TGGTGGTAGGAAGAGTAAAG          |
| <i>NKX2.1</i>                               | CGCATCCAATCTCAAGGAAT           | CAGAGTGTGCCCAGAGTGAA          |
| <i>PAX6</i>                                 | TGGGCAGGTATTACGAGACTG          | ACTCCCGCTTATACTGGGCTA         |
| <i>OTX2</i>                                 | CAAAGTGAGACCTGCCAAAAGA         | TGGACAAGGGATCTGACAGTG         |
| <i>FOXP1</i>                                | GAGCGACGACGTGTCATC             | GCCGTTGTAACTCAAAGTGCTG        |
| <i>COUP-TF1</i>                             | TTCAAGAGGAGCGTCCGCA            | TTGGAGGCATTCTTCCTCGC          |
| <i>EMX1</i>                                 | AGCGCGCTTTACCATAGAG            | CAGGGAAGCCACTCACGAAG          |
| <i>EMX2</i>                                 | CGGCACTCAGCTACGCTAAC           | CAAGTCCGGGTTGGAGTAGAC         |
| <i>SP8</i>                                  | CTTGGTGGGGGTGACTTTT            | TGCAGCGATTGACAAGA             |
| <i>EN1</i>                                  | GAGCGCAGGGCACCAATA             | CGAGTCAGTTTTGACCACGG          |
| <i>GBX2</i>                                 | CCGCCTTCAGCATAGACTCG           | GGTAGCCGGTGTAGACGAAAT         |
| <i>HOBX2</i>                                | CGCCAGGATTCACCTTTCCTT          | CCCTGTAGGCTAGGGGAGAG          |
| <b>DNA sequencing primers</b>               |                                |                               |
| <b>Primers</b>                              | <b>Sequences (5'→3')</b>       |                               |
| Rgp -F1                                     | AAGTGCTCAGGAGTAGCGGT           |                               |
| Rgp-F2                                      | GGCAGACCCGCTACCGTT             |                               |
| TVA-F                                       | TGCTGATCACTGCAGTGCTCC          |                               |
| WPRE-F                                      | ACCACCTGTCAGCTCCTTTCC          |                               |
| PGK-R                                       | GCTAAAGCGCATGCTCCAGACTG        |                               |
